# Supplementary material for: Ultrasonic decoating as a new recycling path to separate oxygen side layers of solid oxide cells
Source: Royal Society of Chemistry journal article supplement (doi:10.1039/d3gc03189f), 2023-12-22
Supplement: d3gc03189f1.pdf [file d3gc03189f1.pdf]

## Ultrasonic decoating as a new recycling path to separate oxygen side layers of solid oxide cells

C. Kaiser, Thomas Buchwald and U. A. Peuker

Institute of Mechanical Process Engineering and Mineral Processing, TU Bergakademie Freiberg, 09599 Freiberg, Germany

### Supplementary Information

#### Additional material information

XRD pattern of comparable LSCF see: <http://hdl.handle.net/2128/31605>

XRD pattern of comparable LSM see: <https://fuelcellmaterials.com/products/powders/cathode-powders/cathode-lanthanum-based/lanthanum-strontium-manganite-20-cathode-powder/#x-ray-diffraction>

#### Ultrasonic decoating

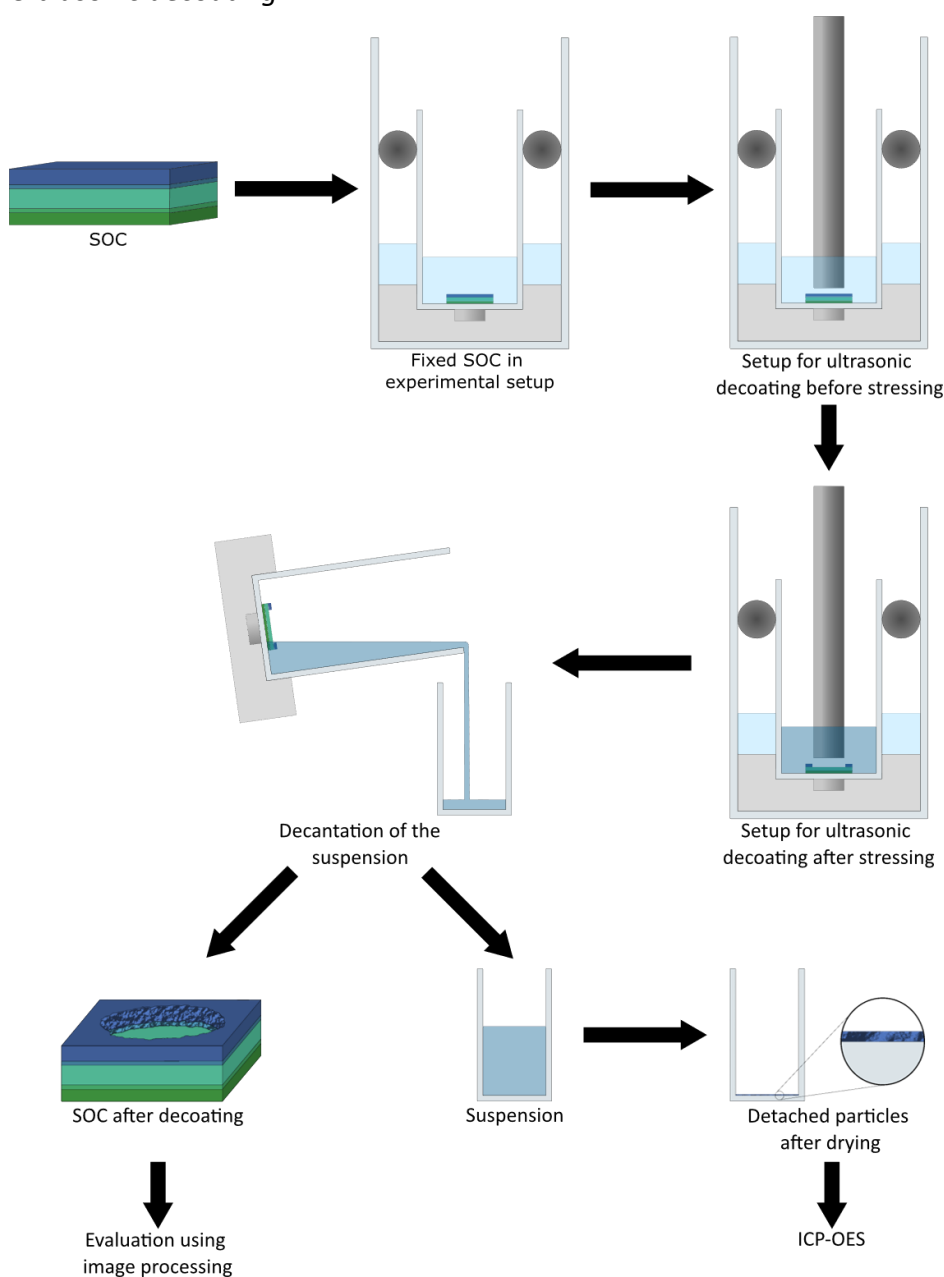

Figure S1: Workflow for ultrasonic decoating

*Raw image data*

All raw data available. See DOI: 10.25532/OPARA-250

**Table S1:** Raw images data of cell type 1a

| Sample | Spacing in mm | Time in s | Image after stressing                                                                |
|--------|---------------|-----------|--------------------------------------------------------------------------------------|
| 1a-1   | 2             | 5         |    |
| 1a-2   | 2             | 5         |    |
| 1a-3   | 2             | 5         |   |
| 1a-4   | 2             | 10        |  |
| 1a-5   | 2             | 10        |  |

| Sample | Spacing in mm | Time in s | Image after stressing                                                                |
|--------|---------------|-----------|--------------------------------------------------------------------------------------|
| 1a-6   | 2             | 10        |    |
| 1a-7   | 2             | 15        |    |
| 1a-8   | 2             | 15        |   |
| 1a-9   | 2             | 15        |  |
| 1a-10  | 2             | 30        |  |
| 1a-11  | 2             | 30        |  |

| Sample | Spacing in mm | Time in s | Image after stressing                                                                |
|--------|---------------|-----------|--------------------------------------------------------------------------------------|
| 1a-12  | 2             | 30        |    |
| 1a-13  | 3             | 30        |    |
| 1a-14  | 3             | 30        |   |
| 1a-15  | 4             | 30        |  |
| 1a-16  | 4             | 30        |  |

**Table S2:** Raw images data of cell type 1b

| Sample | Spacing in mm | Time in s | Image after stressing                                                                |
|--------|---------------|-----------|--------------------------------------------------------------------------------------|
| 1b-1   | 2             | 5         | 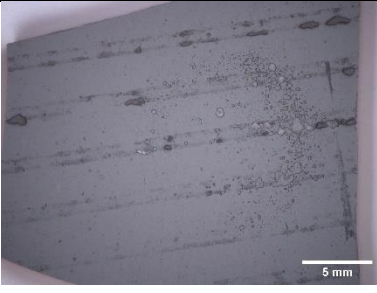   |
| 1b-2   | 2             | 5         |    |
| 1b-3   | 2             | 5         |   |
| 1b-4   | 2             | 10        |  |
| 1b-5   | 2             | 10        |  |
| 1b-6   | 2             | 10        |  |



| Sample | Spacing in mm | Time in s | Image after stressing                                                                |
|--------|---------------|-----------|--------------------------------------------------------------------------------------|
| 1b-7   | 2             | 30        | 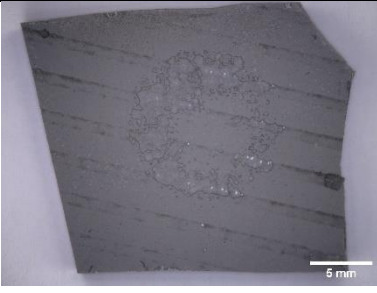   |
| 1b-8   | 2             | 30        |    |
| 1b-9   | 2             | 30        |   |
| 1b-10  | 2             | 60        |  |
| 1b-11  | 2             | 60        |  |
| 1b-12  | 2             | 60        |  |

**Table S3:** Raw images data of cell type 2

| Sample | Spacing in mm | Time in s | Image after stressing                                                                |
|--------|---------------|-----------|--------------------------------------------------------------------------------------|
| 2-1    | 4             | 120       |    |
| 2-2    | 4             | 120       |    |
| 2-3    | 3             | 120       |   |
| 2-4    | 3             | 120       |  |
| 2-5    | 2             | 120       |  |
| 2-6    | 2             | 120       |  |

## Detailed image processing steps

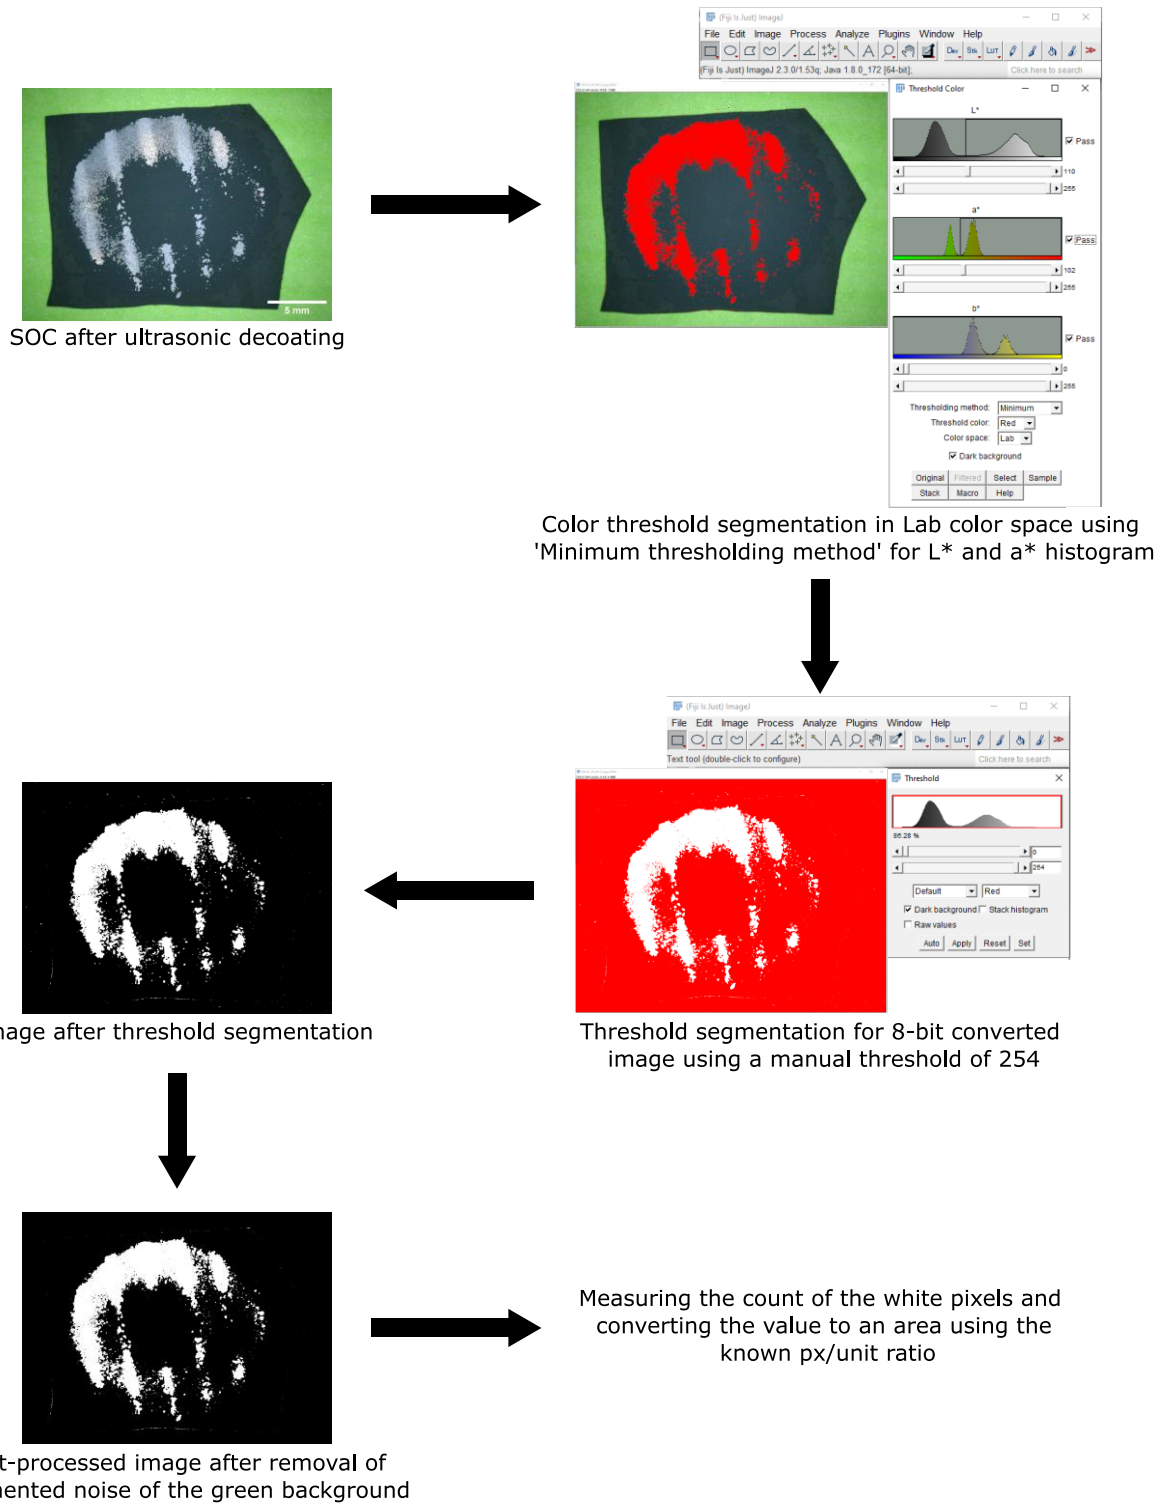

**Figure S2:** Image processing for images with a good contrast between decoated area and coated area



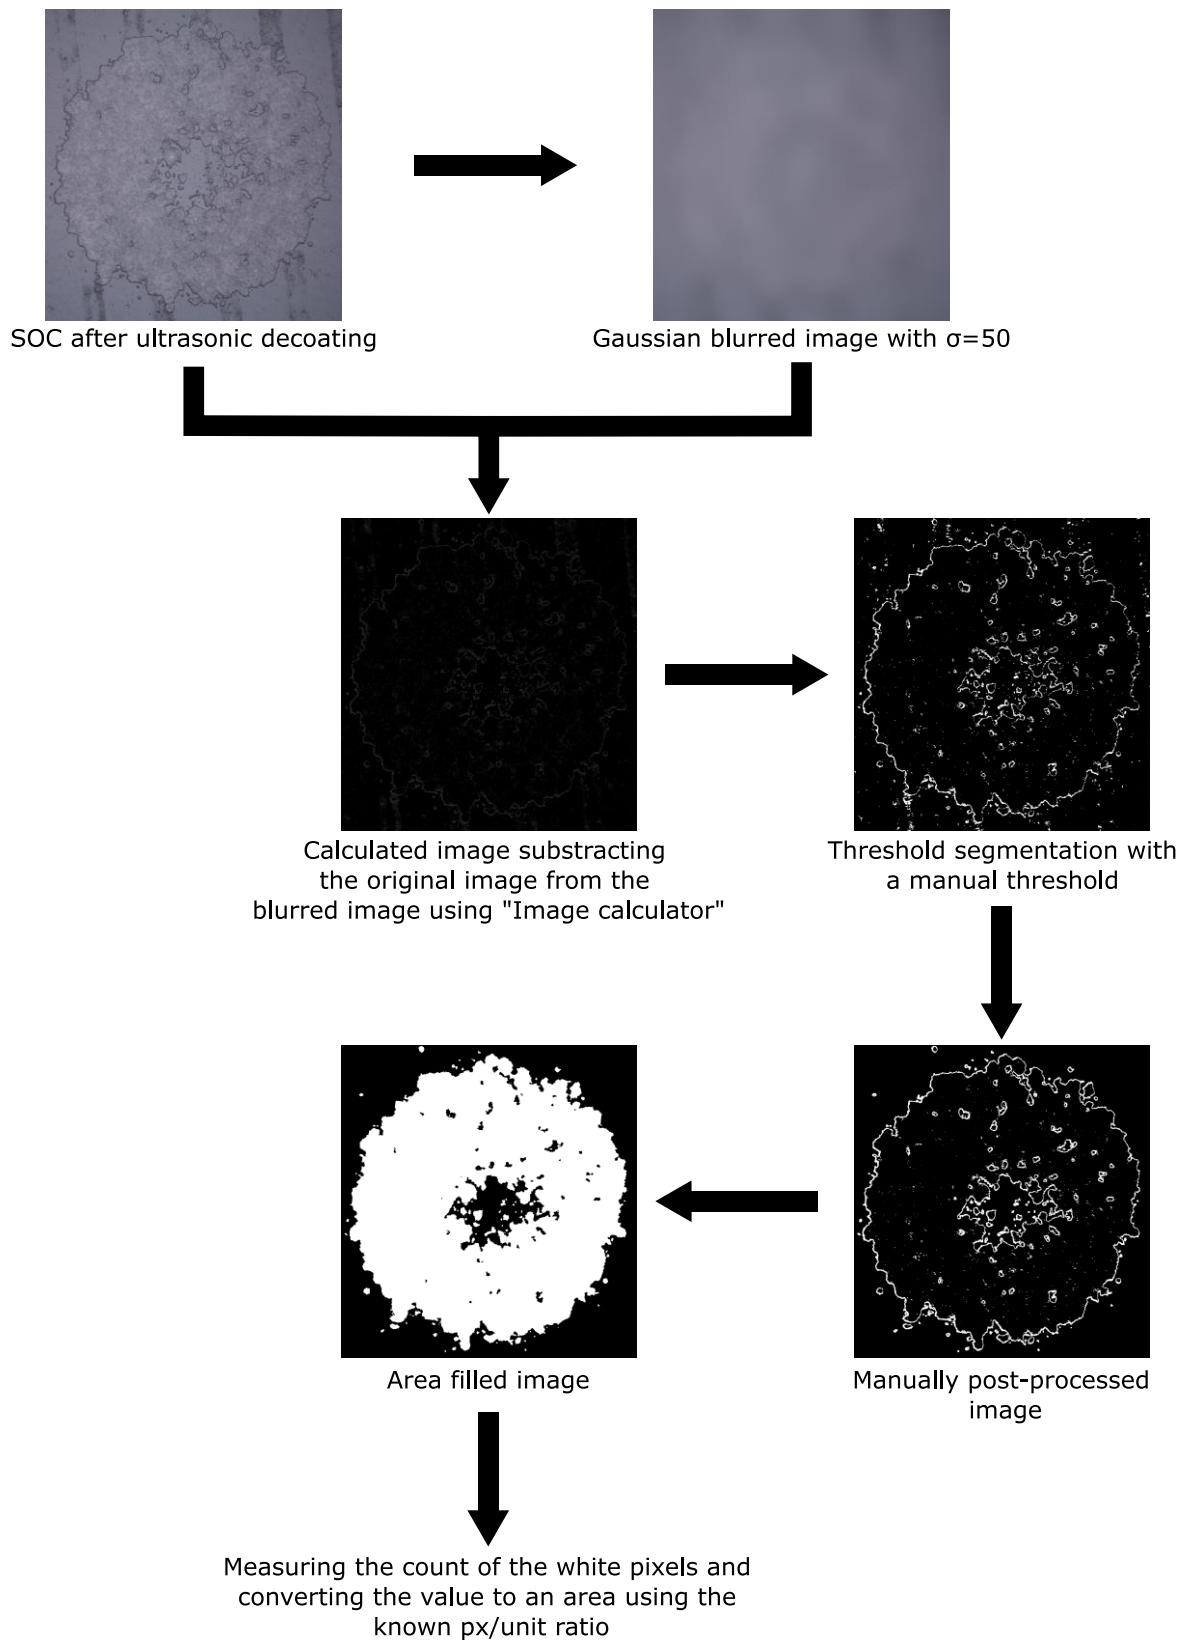

**Figure S3:** Image processing for images with a poor contrast between decoated area and coated area but a sharp contour line
